# Supplementary material for: Service-Learning, Movies, and Infectious Diseases: Implementation of an Active Educational Program in Microbiology as a Tool for Engagement in Social Justice
Source: Frontiers journal article supplement (doi:10.3389/fmicb.2021.589401), 2021-06-29
Supplement: Data_Sheet_2.pdf [file Data_Sheet_2.pdf]

***Movies and Infectious Diseases S-L project***  
**Post-survey for students of two editions. Questions and results**

**0. Information on the survey and agreement on confidentiality terms**

Values: 1-5: 1, very low/strongly disagree - 5, very high/strongly agree

**Mean values**

**1. Contribution to learning and acquisition of specific competencies**

|                                                                                    |      |
|------------------------------------------------------------------------------------|------|
| The project is related to my studies                                               | 4,59 |
| I have learned new concepts about infectious diseases                              | 3,93 |
| I have reinforced previous concepts I had studied during my bachelor degree        | 4,61 |
| I have learned about Public Health as a professional activity                      | 4,14 |
| I understood the relevance of Public Health                                        | 4,71 |
| The project increased my perception about the importance of scientific divulgation | 4,71 |
| I practised correct scientific expression                                          | 4,46 |
| The experience has contributed to orientate my future career                       | 3,57 |

**2. Contribution to develop general competencies and skills**

|                                                     |      |
|-----------------------------------------------------|------|
| Teamwork                                            | 4,28 |
| Coordination                                        | 4,21 |
| Selforganization and managing my time               | 4,28 |
| Assuming responsibility                             | 4,24 |
| Critical analysis                                   | 4,34 |
| Preparation of scientific and divulgation materials | 4,41 |
| Oral expression                                     | 4,00 |
| Solving doubts                                      | 4,11 |
| Expressing my own ideas                             | 4,00 |

**3. Contribution to community service and to my social consciousness**

|                                                                         |      |
|-------------------------------------------------------------------------|------|
| I did a service to community                                            | 4,55 |
| I think I did normal volunteering*                                      | 3,60 |
| My social consciousness has increased                                   | 4,66 |
| I discovered social disadvantaged situations, previously unknown for me | 4,03 |

|                                                    |      |
|----------------------------------------------------|------|
| I knew the Social Function of the University (SFU) | 2,31 |
| I have contributed with the SFU                    | 4,31 |

#### **4. S-L Methodology**

|                                                                                                |      |
|------------------------------------------------------------------------------------------------|------|
| I knew S-L                                                                                     | 1,86 |
| I had participated in S-L projects before                                                      | 1,32 |
| I have participated in other projects of Innovative Learning methodologies                     | 1,71 |
| S-L is an adequate methodology for learning specific contents related to my bachelor degree    | 4,41 |
| S-L is adequate for developing general competencies that are not acquired with normal lectures | 4,37 |
| The activity could be included as mandatory in one of the subjects I am studying               | 2,79 |
| S-L should be mandatory at least once in all the university studies                            | 4,28 |
| I get information about S-L projects from my faculty or from the university                    | 2,52 |

#### **5. Reasons to participate in the project**

|                                         |      |
|-----------------------------------------|------|
| Occupying my time                       | 2,10 |
| Obtain extra credits                    | 2,69 |
| Improve my curriculum                   | 4,07 |
| Learn scientific contents               | 4,21 |
| Improve my general competencies         | 4,45 |
| Confront a personal or social challenge | 4,55 |
| Collaborate to solve problems           | 4,69 |
| Help others                             | 4,72 |
| Curiosity                               | 4,24 |

#### **6. Development of the project and activities and Global satisfaction**

|                                                     |      |
|-----------------------------------------------------|------|
| Formative session: Sexually Transmitted Diseases    | 4,56 |
| Formative session: Cinema                           | 4,28 |
| Formative session: Social needs                     | 4,38 |
| Selection of infectious illness and films           | 4,26 |
| Analysis of films                                   | 4,14 |
| Preparation of scientific and cinematographic cards | 4,37 |
| Preparation of divulgation materials                | 3,86 |
| Question-answer session                             | 3,90 |

|                                                  |      |
|--------------------------------------------------|------|
| Number of sessions at social centres*            | 2,50 |
| Film projection at social centre*                | 3,44 |
| Colloquium at social centre*                     | 3,78 |
| Poster elaboration                               | 4,42 |
| Final session                                    | 4,04 |
| General organization                             | 4,03 |
| Time requiered                                   | 3,90 |
| Number of formative sessions                     | 4,32 |
| Number of team meetings                          | 4,14 |
| Face-to-face meetings                            | 4,37 |
| Visits to social centres*                        | 3,40 |
| Virtual meetings                                 | 4,42 |
| Interactions with team mates                     | 4,34 |
| Interaction with tutors                          | 4,10 |
| Interaction with collective at social centre*    | 4,60 |
| Interaction with coordinators at asocial centre* | 4,10 |
| Would you participate again?                     | 4,59 |
| Woiuld you recommend the activity?               | 4,69 |
| Golbal satisfaction with the activity            | 4,55 |

\* Results correspond only to one edition of the project

## **7. Questions for free writting** (written opinions not included due to their extension)

---

Which part of the project was more difficult?

Which part of the project was more useful for your learning?

The best of the project

The worst of the project

Suggestions for improving

Free coment on what the project has brought you personally

**Movies and Infectious Diseases S-L project**  
**Post-survey for tutors of two editions of the project. Questions and results**

**Information on the survey and agreement on confidentiality terms**

Values: 1-5: 1, very low/strongly disagree - 5, very high/strongly agree

**Mean values**

**1. Contribution to learning and acquisition of specific competencies by the students**

|                                                                   |      |
|-------------------------------------------------------------------|------|
| The project is related with the students' curricula               | 5,00 |
| The students have acquired new concepts about infectious diseases | 4,38 |
| The students have reinforced previous concepts                    | 4,62 |
| The students understood the relevance of Public Health            | 4,54 |
| The students appreciated the importance of scientific divulgation | 4,38 |
| The students improved their scientific expression                 | 4,00 |

**2. Contribution to develop general competencies and skills by the students**

|                                                     |      |
|-----------------------------------------------------|------|
| Teamwork                                            | 4,62 |
| Coordination                                        | 4,38 |
| Assuming responsibility                             | 4,38 |
| Preparation of scientific and divulgation materials | 4,46 |
| Critical analysis                                   | 4,15 |
| Oral expression                                     | 3,92 |
| Solving doubts                                      | 4,00 |
| Explaining science to non-specialised public        | 4,33 |

**3. Contribution to community service and to my social consciousness**

|                                                                         |      |
|-------------------------------------------------------------------------|------|
| My social consciousness has increased                                   | 4,46 |
| I discovered social disadvantaged situations, previously unknown for me | 4,08 |
| I did a service to community                                            | 4,46 |
| I think I did normal volunteering                                       | 1,77 |

**4. S-L Methodology**

|            |      |
|------------|------|
| I knew S-L | 3,69 |
|------------|------|

|                                                                            |      |
|----------------------------------------------------------------------------|------|
| I had participated in S-L projects before                                  | 3,00 |
| I have participated in other projects of Innovative Learning methodologies | 3,23 |
| S-L is an adequate methodology for students                                | 4,69 |
| S-L should be mandatory at least once in all the university studies        | 4,46 |
| The activity could be included as mandatory in one of the subjects I teach | 2,42 |
| S-L contributes to Social Function of the University                       | 4,85 |

#### **6. Development of the project and activities and Global satisfaction**

---

|                                                     |      |
|-----------------------------------------------------|------|
| Organisation                                        | 4,23 |
| Time required                                       | 4,08 |
| Face-to-face meetings with the students             | 3,54 |
| Virtual meetings                                    | 4,25 |
| Film projection at social centre*                   | 4,40 |
| Colloquium at social centre*                        | 4,20 |
| Formative session: Sexually Transmitted Diseases    | 4,88 |
| Formative session: Cinema                           | 4,75 |
| Formative session: social needs                     | 4,50 |
| Final session                                       | 4,75 |
| Interaction with students                           | 4,31 |
| Interaction with tutors                             | 4,08 |
| Interaction with collective at social centre*       | 4,00 |
| Interaction with the coordinators at social centre* | 4,20 |
| Would you repeat the activity?                      | 4,85 |
| Would you recommend the activity?                   | 4,92 |
| Global satisfaction                                 | 4,77 |

\* Results correspond only to one edition of the project

#### **7. Questions for free writing** (written opinions not included due to their extension)

---

Which part of the project was more useful for students' learning?  
The best of the project  
The worst of the project  
Suggestions for improving
